# Supplementary material
Source: HighWire-hosted journal article supplement (https://bjsm.bmj.com/content/54/20/1188)

**Appendix 7** Effect size (95% confidence interval) of interventions using activity trackers on physical activity by pooling data from 7 studies comparing 3 and 6-month effects of activity tracker use versus control using random-effects meta-analysis (n =599)

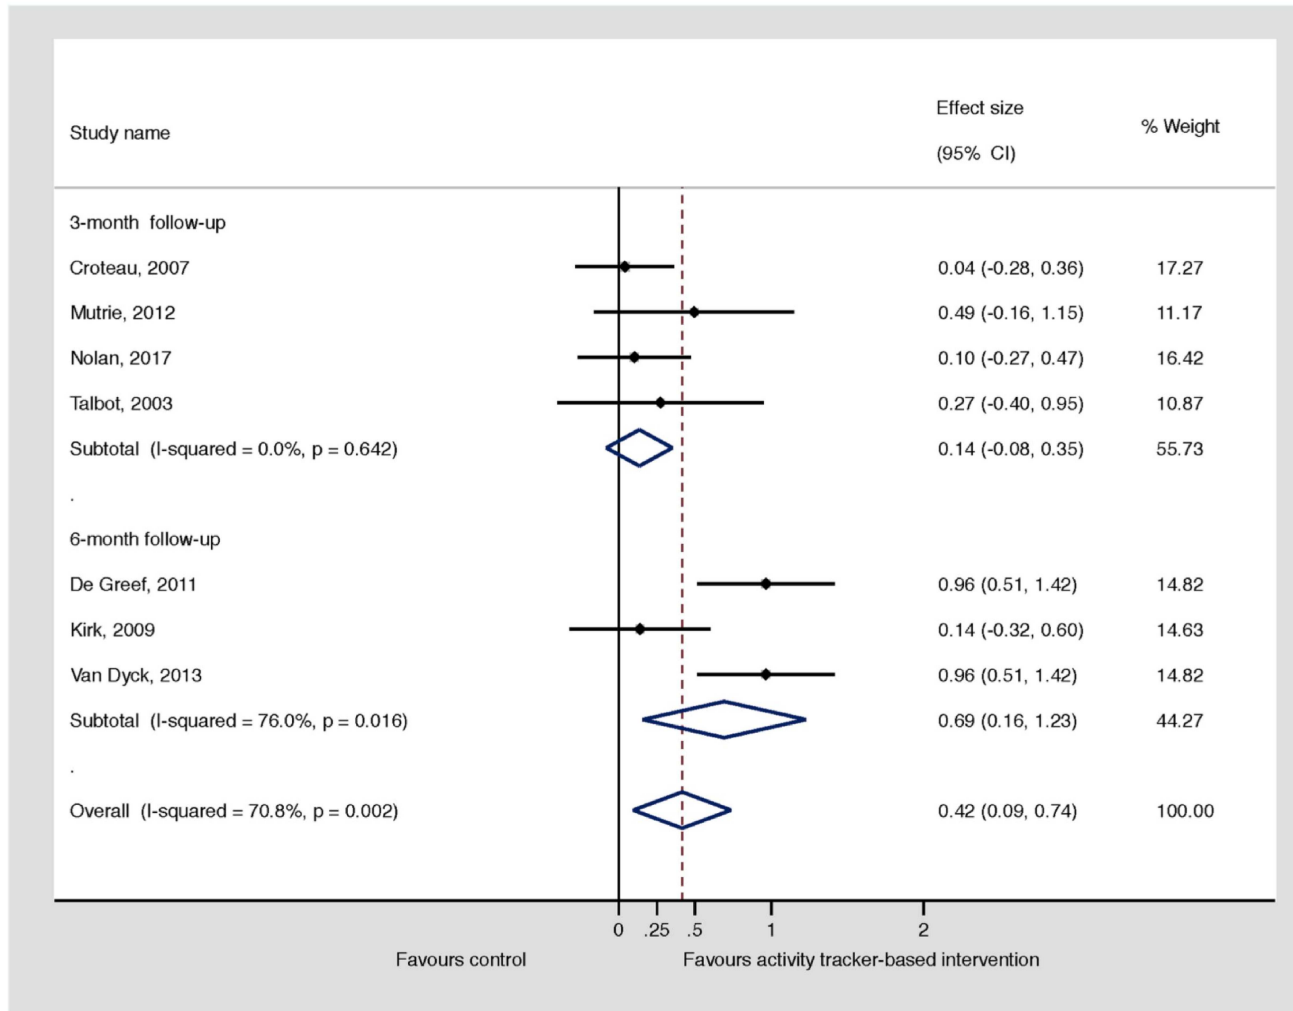

Supplement: inline-supplementary-material-7 [file inline-supplementary-material-7.pdf]
